# Supplementary material
Source: publisher site journal article supplement (https://www.dovepress.com/get_supplementary_file.php?f=470005.docx)
Supplement: Supplementary file 1 [file get_supplementary_file.php]

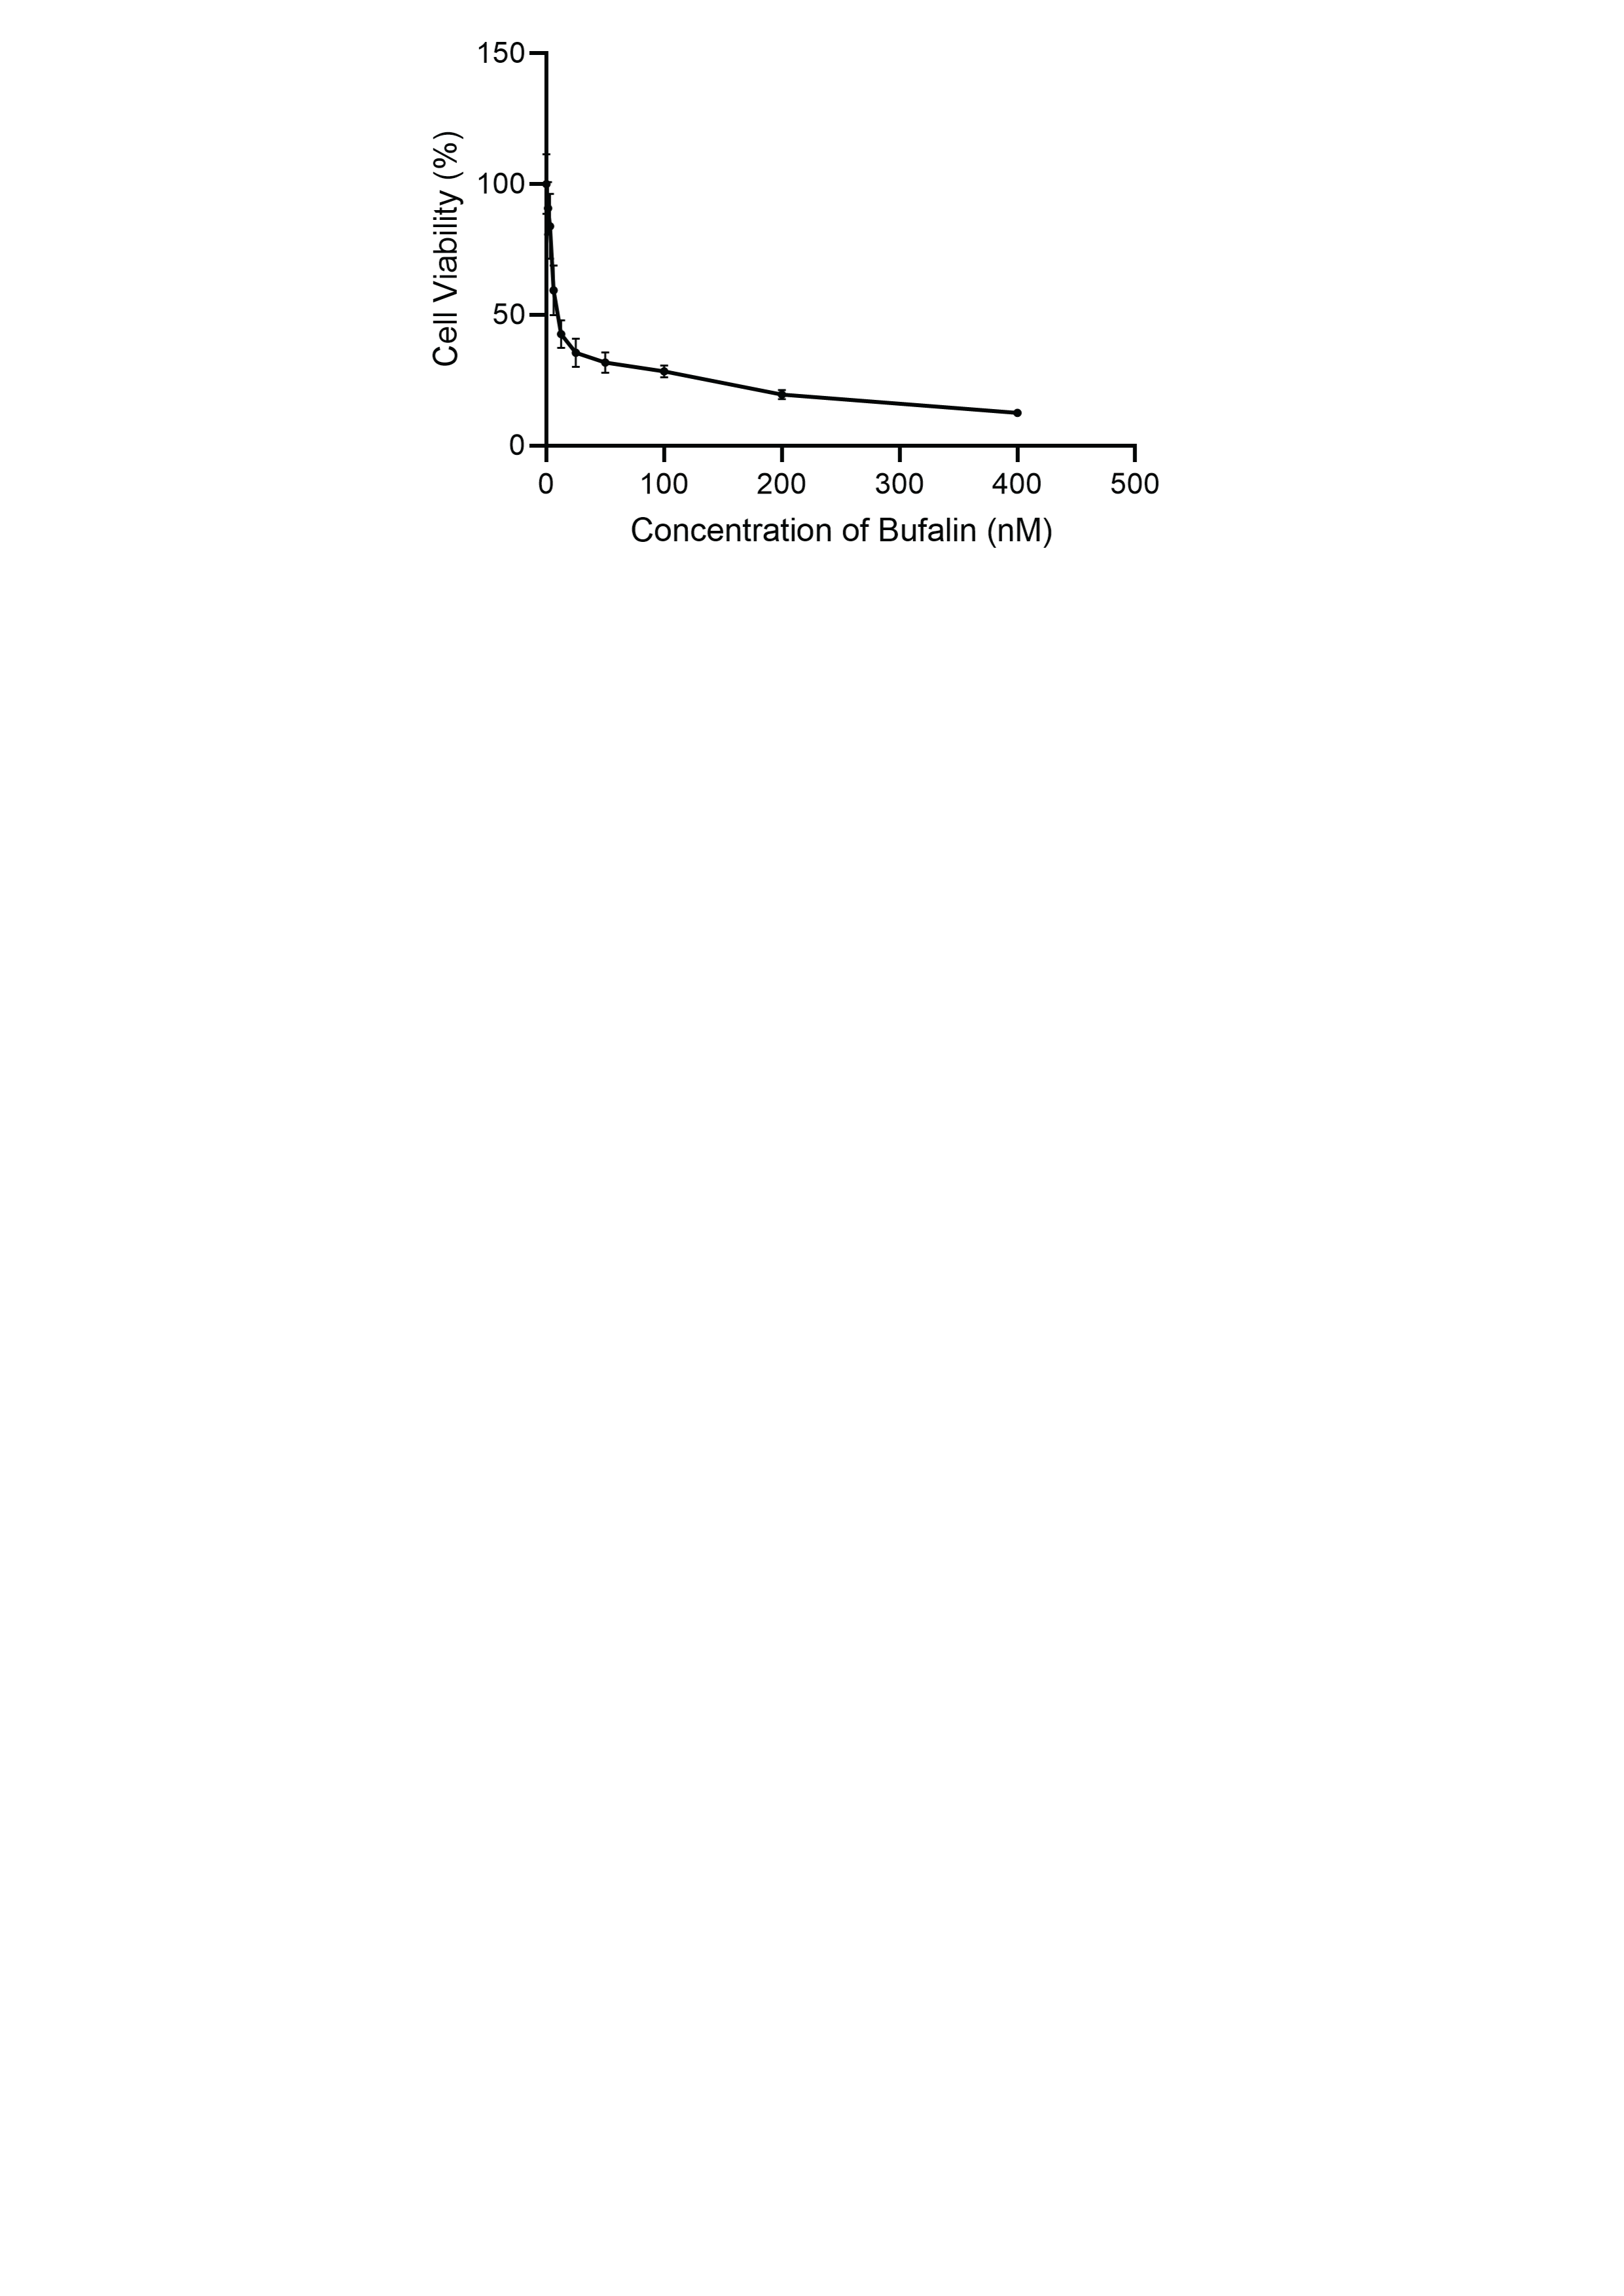


Figure S1. Cytotoxicity of BU on HCT116 cells under hypoxia condition by CCK-8. (n=3).


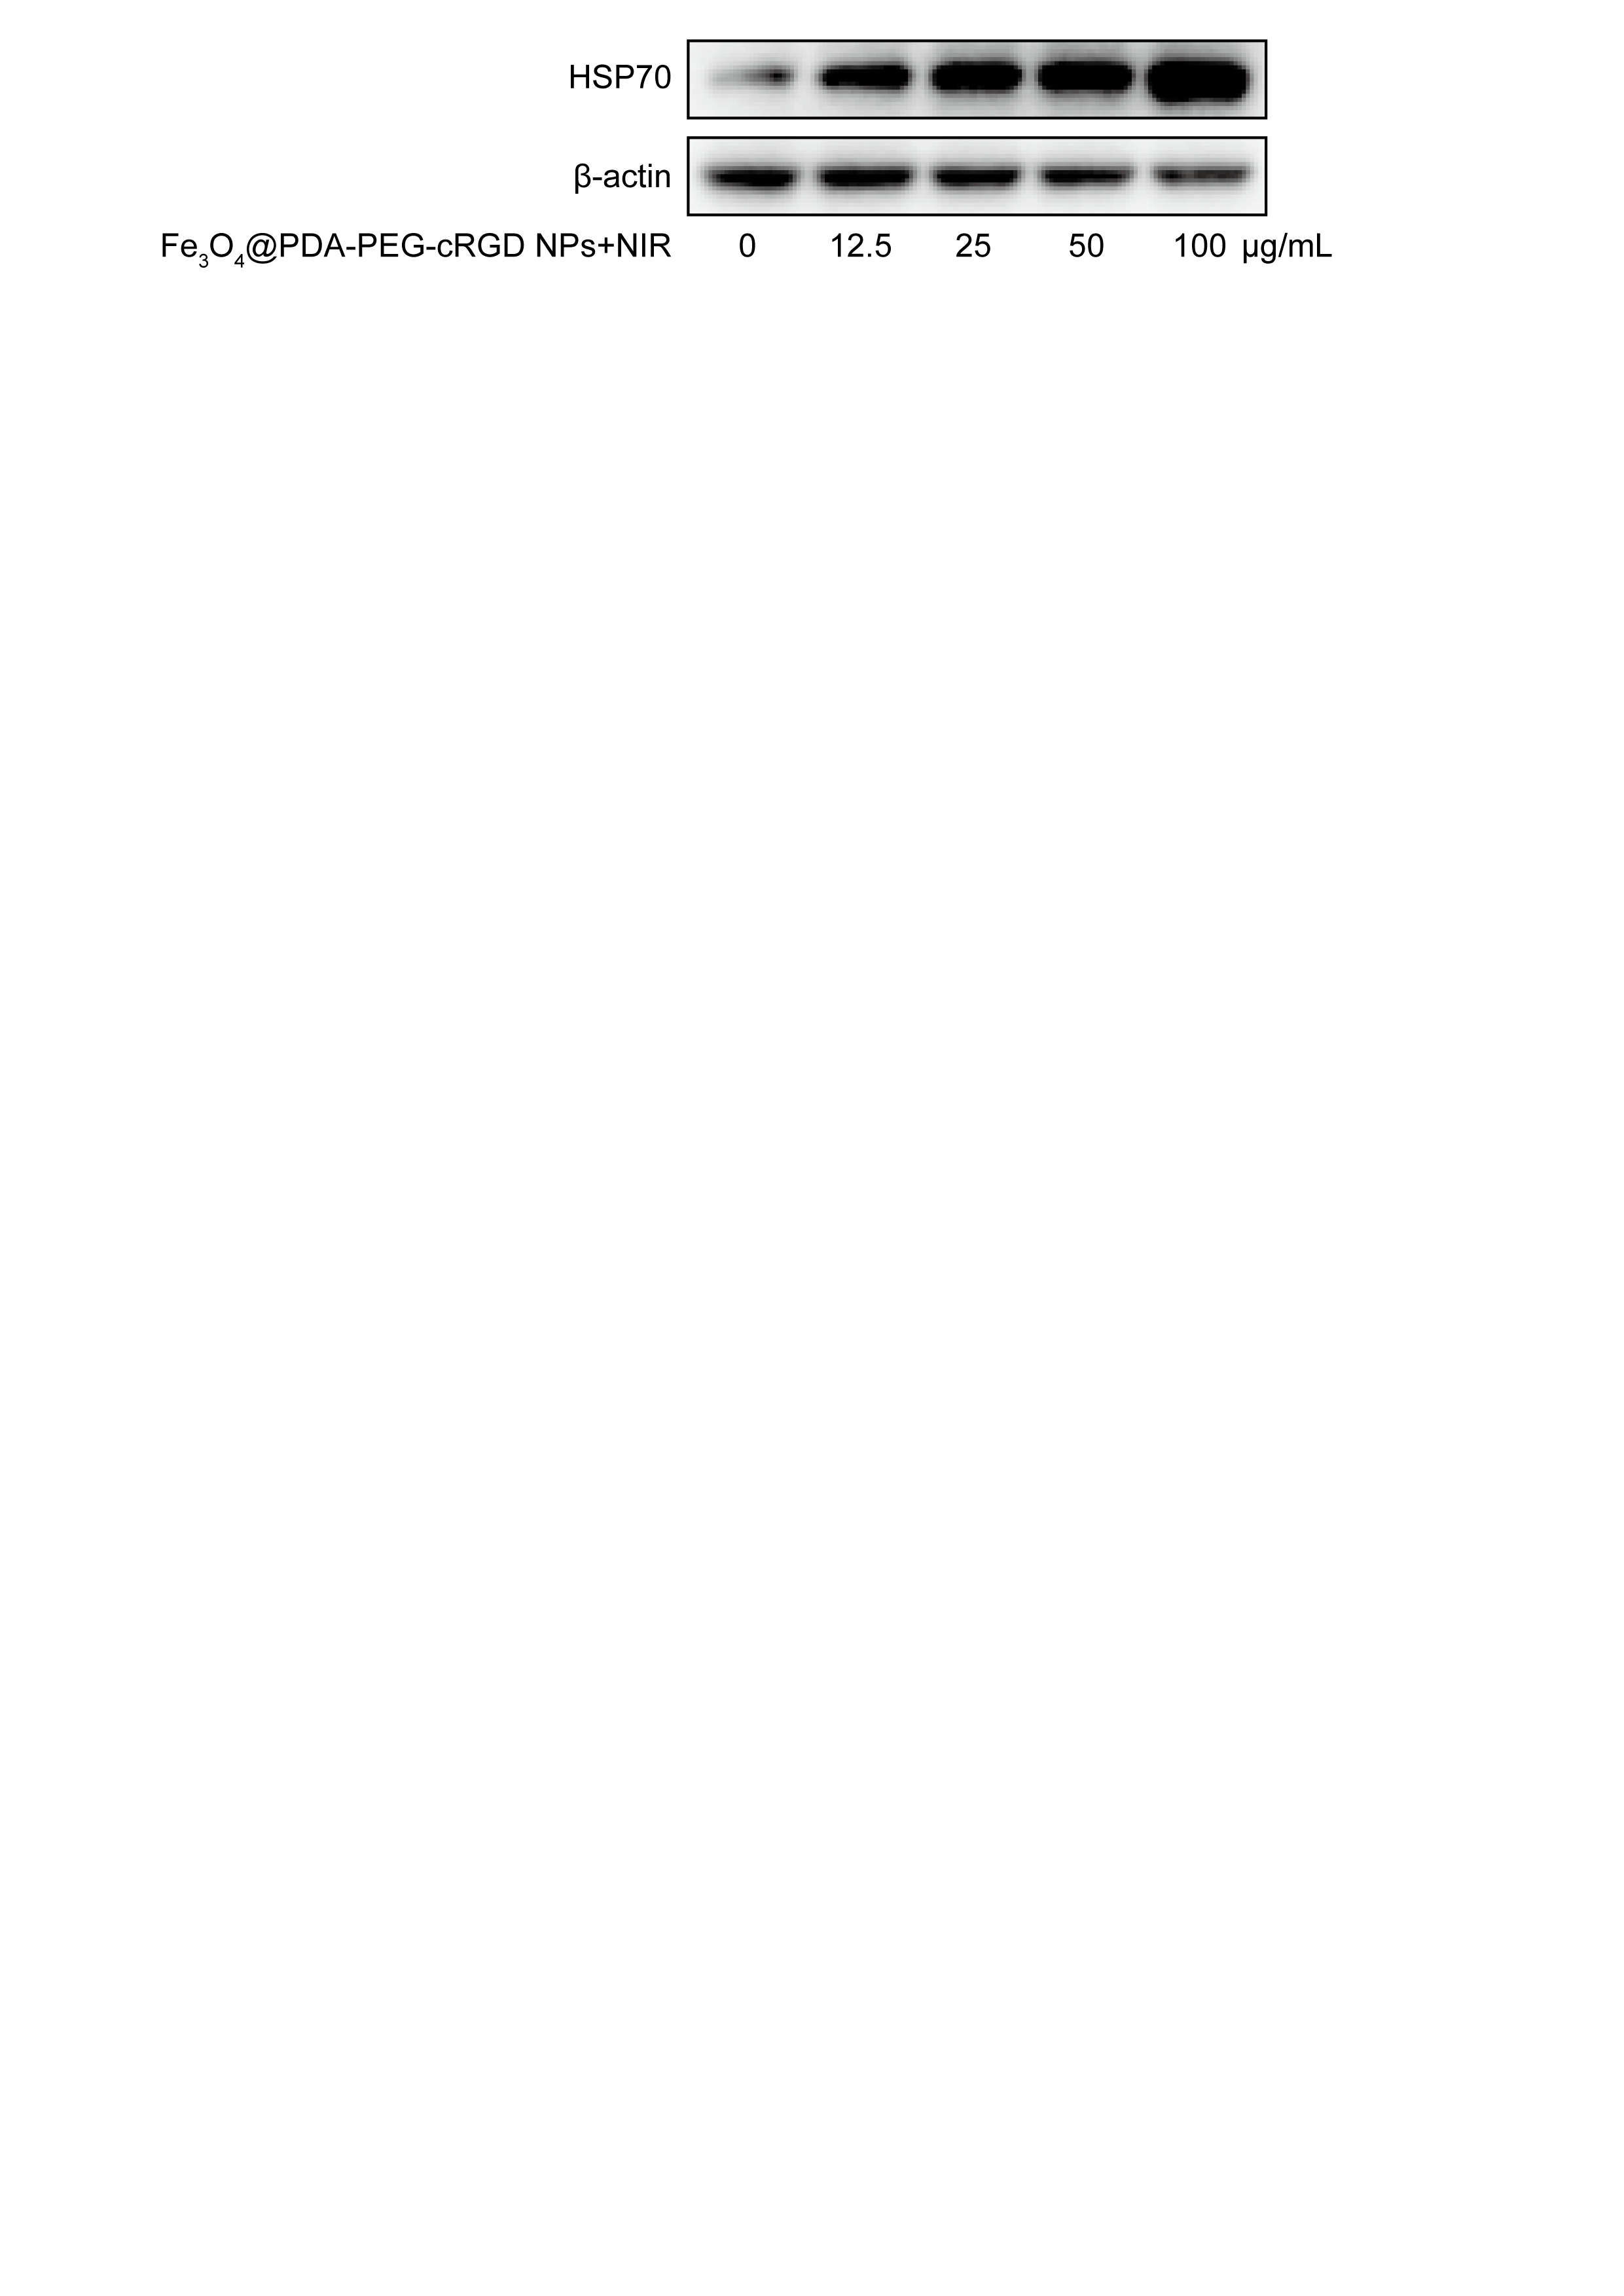


Figure S2. HSP70 expression on HCT116 cells after being treated with different concentrations of Fe3O4@PDA-PEG-cRGD NPs with NIR. (n=3).


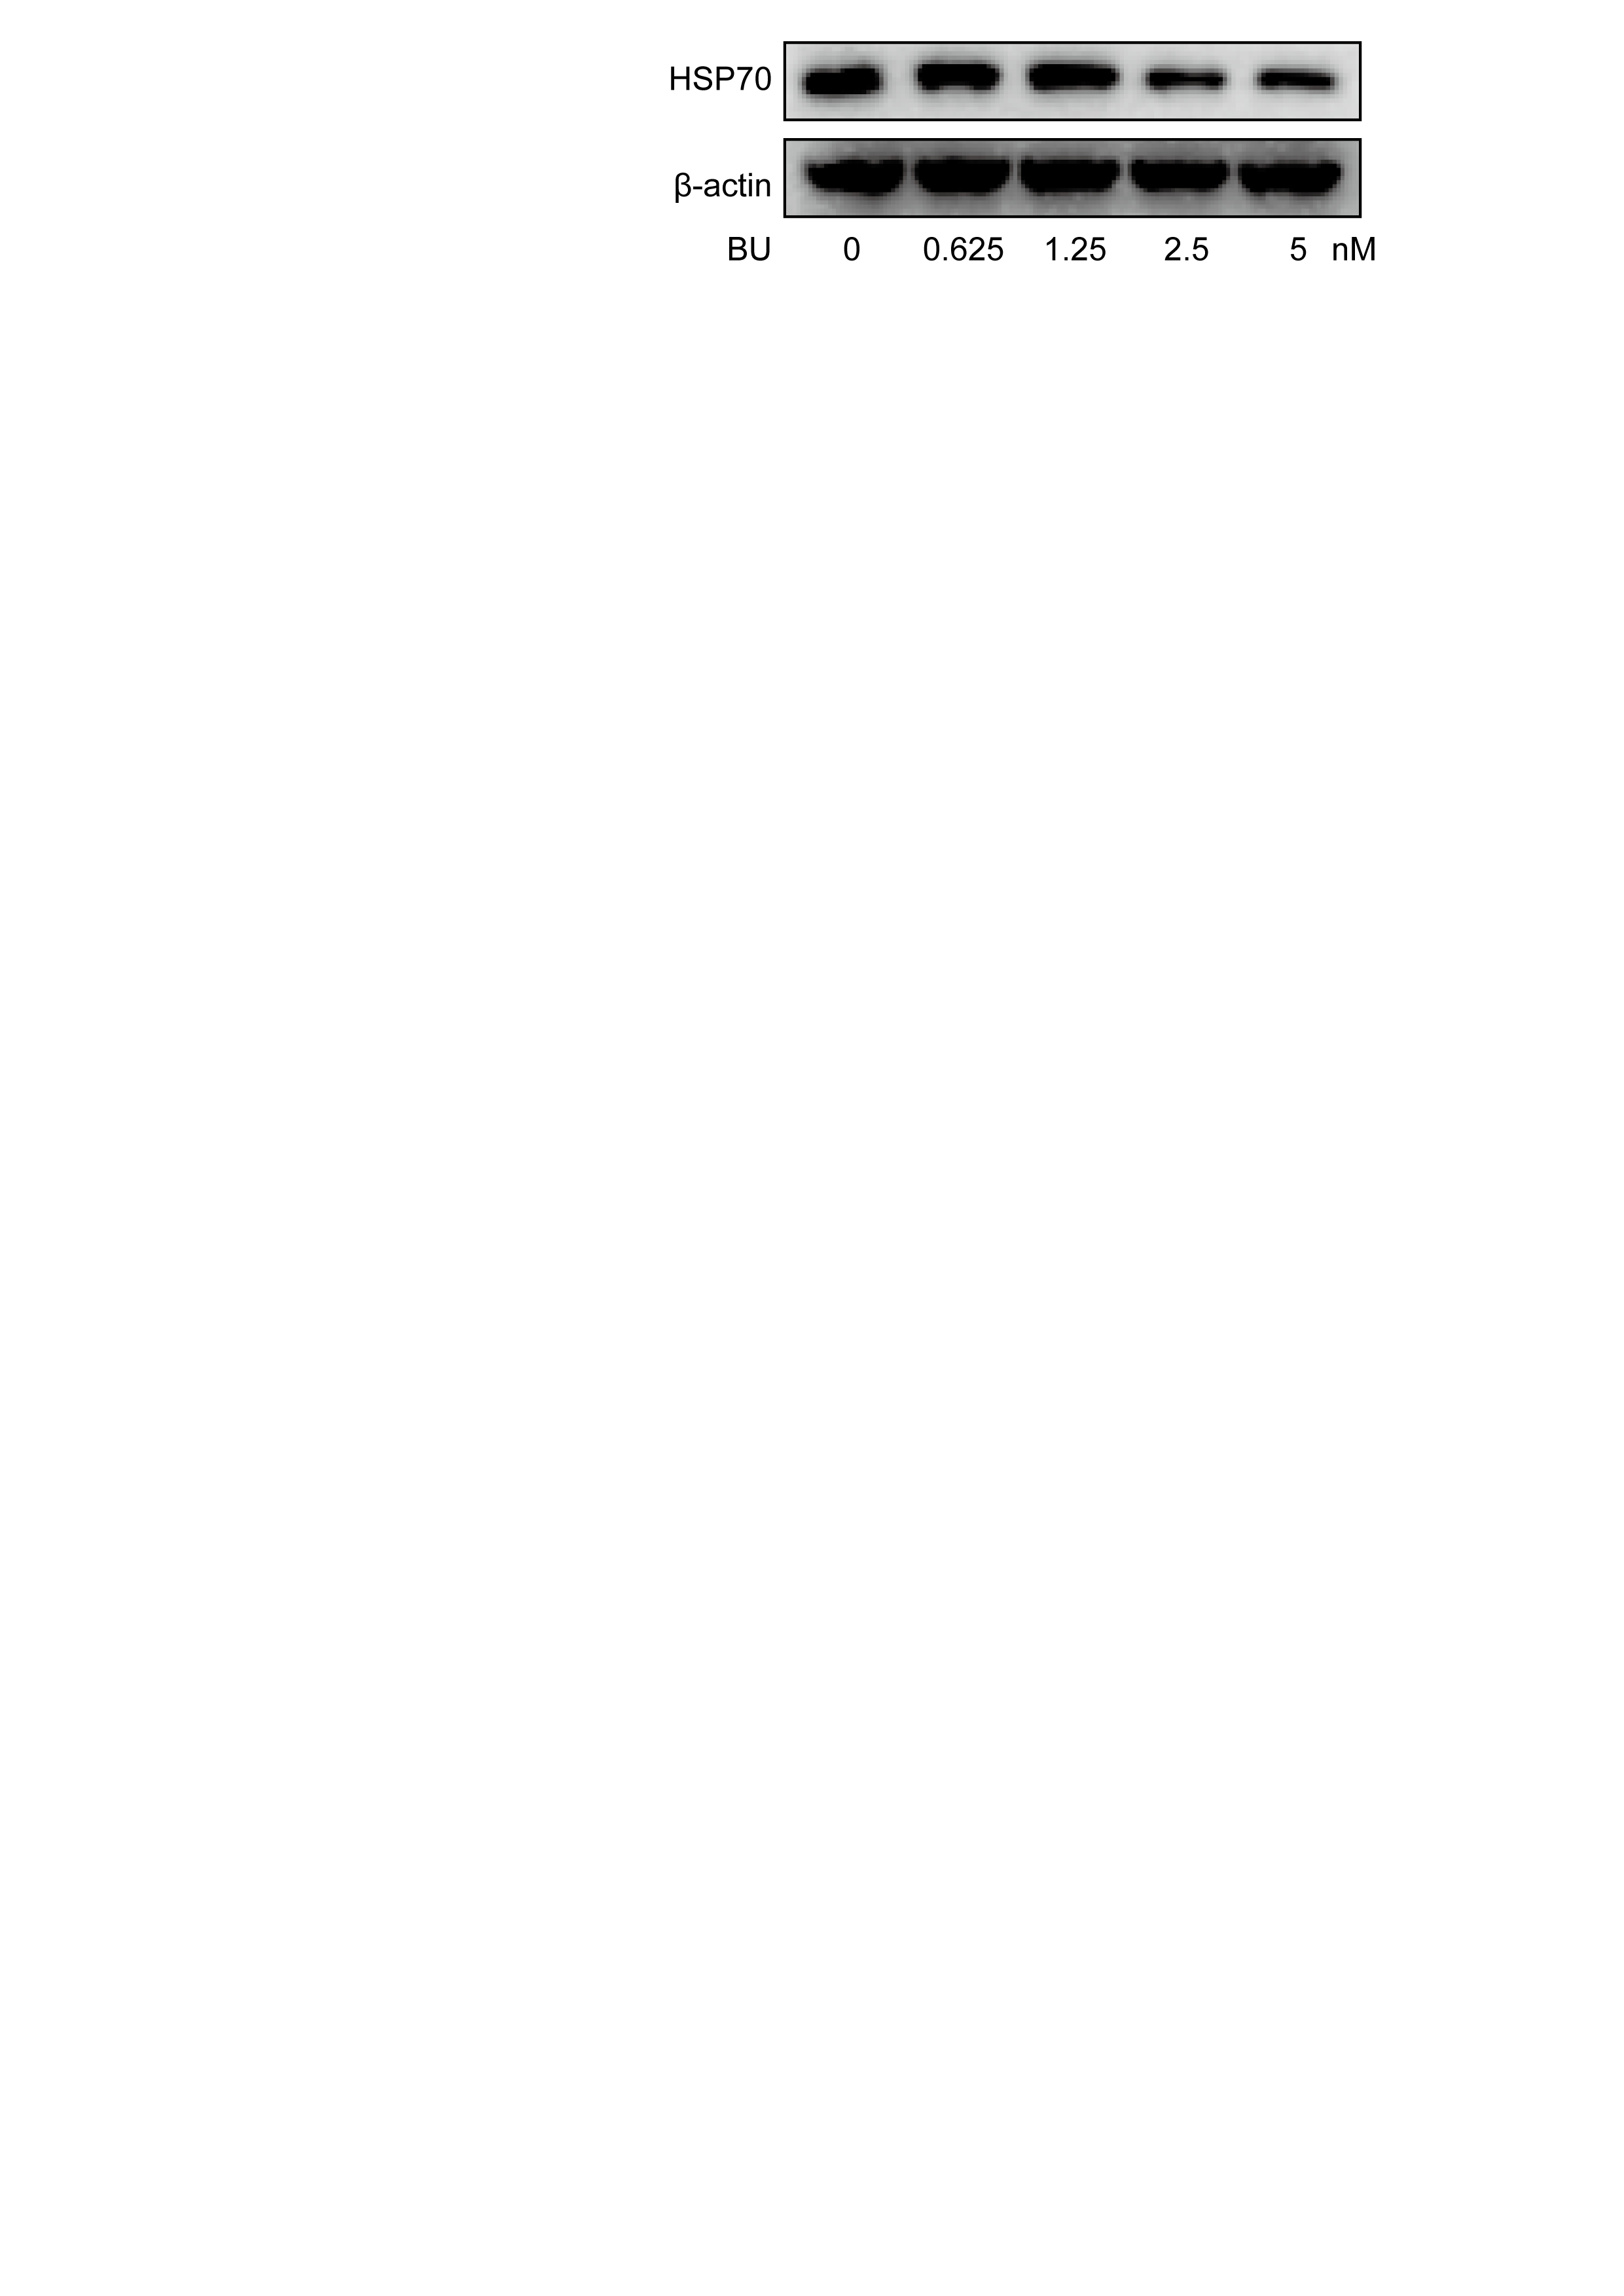


Figure S3. HSP70 expression on HCT116 cells after being treated with free BU.

**
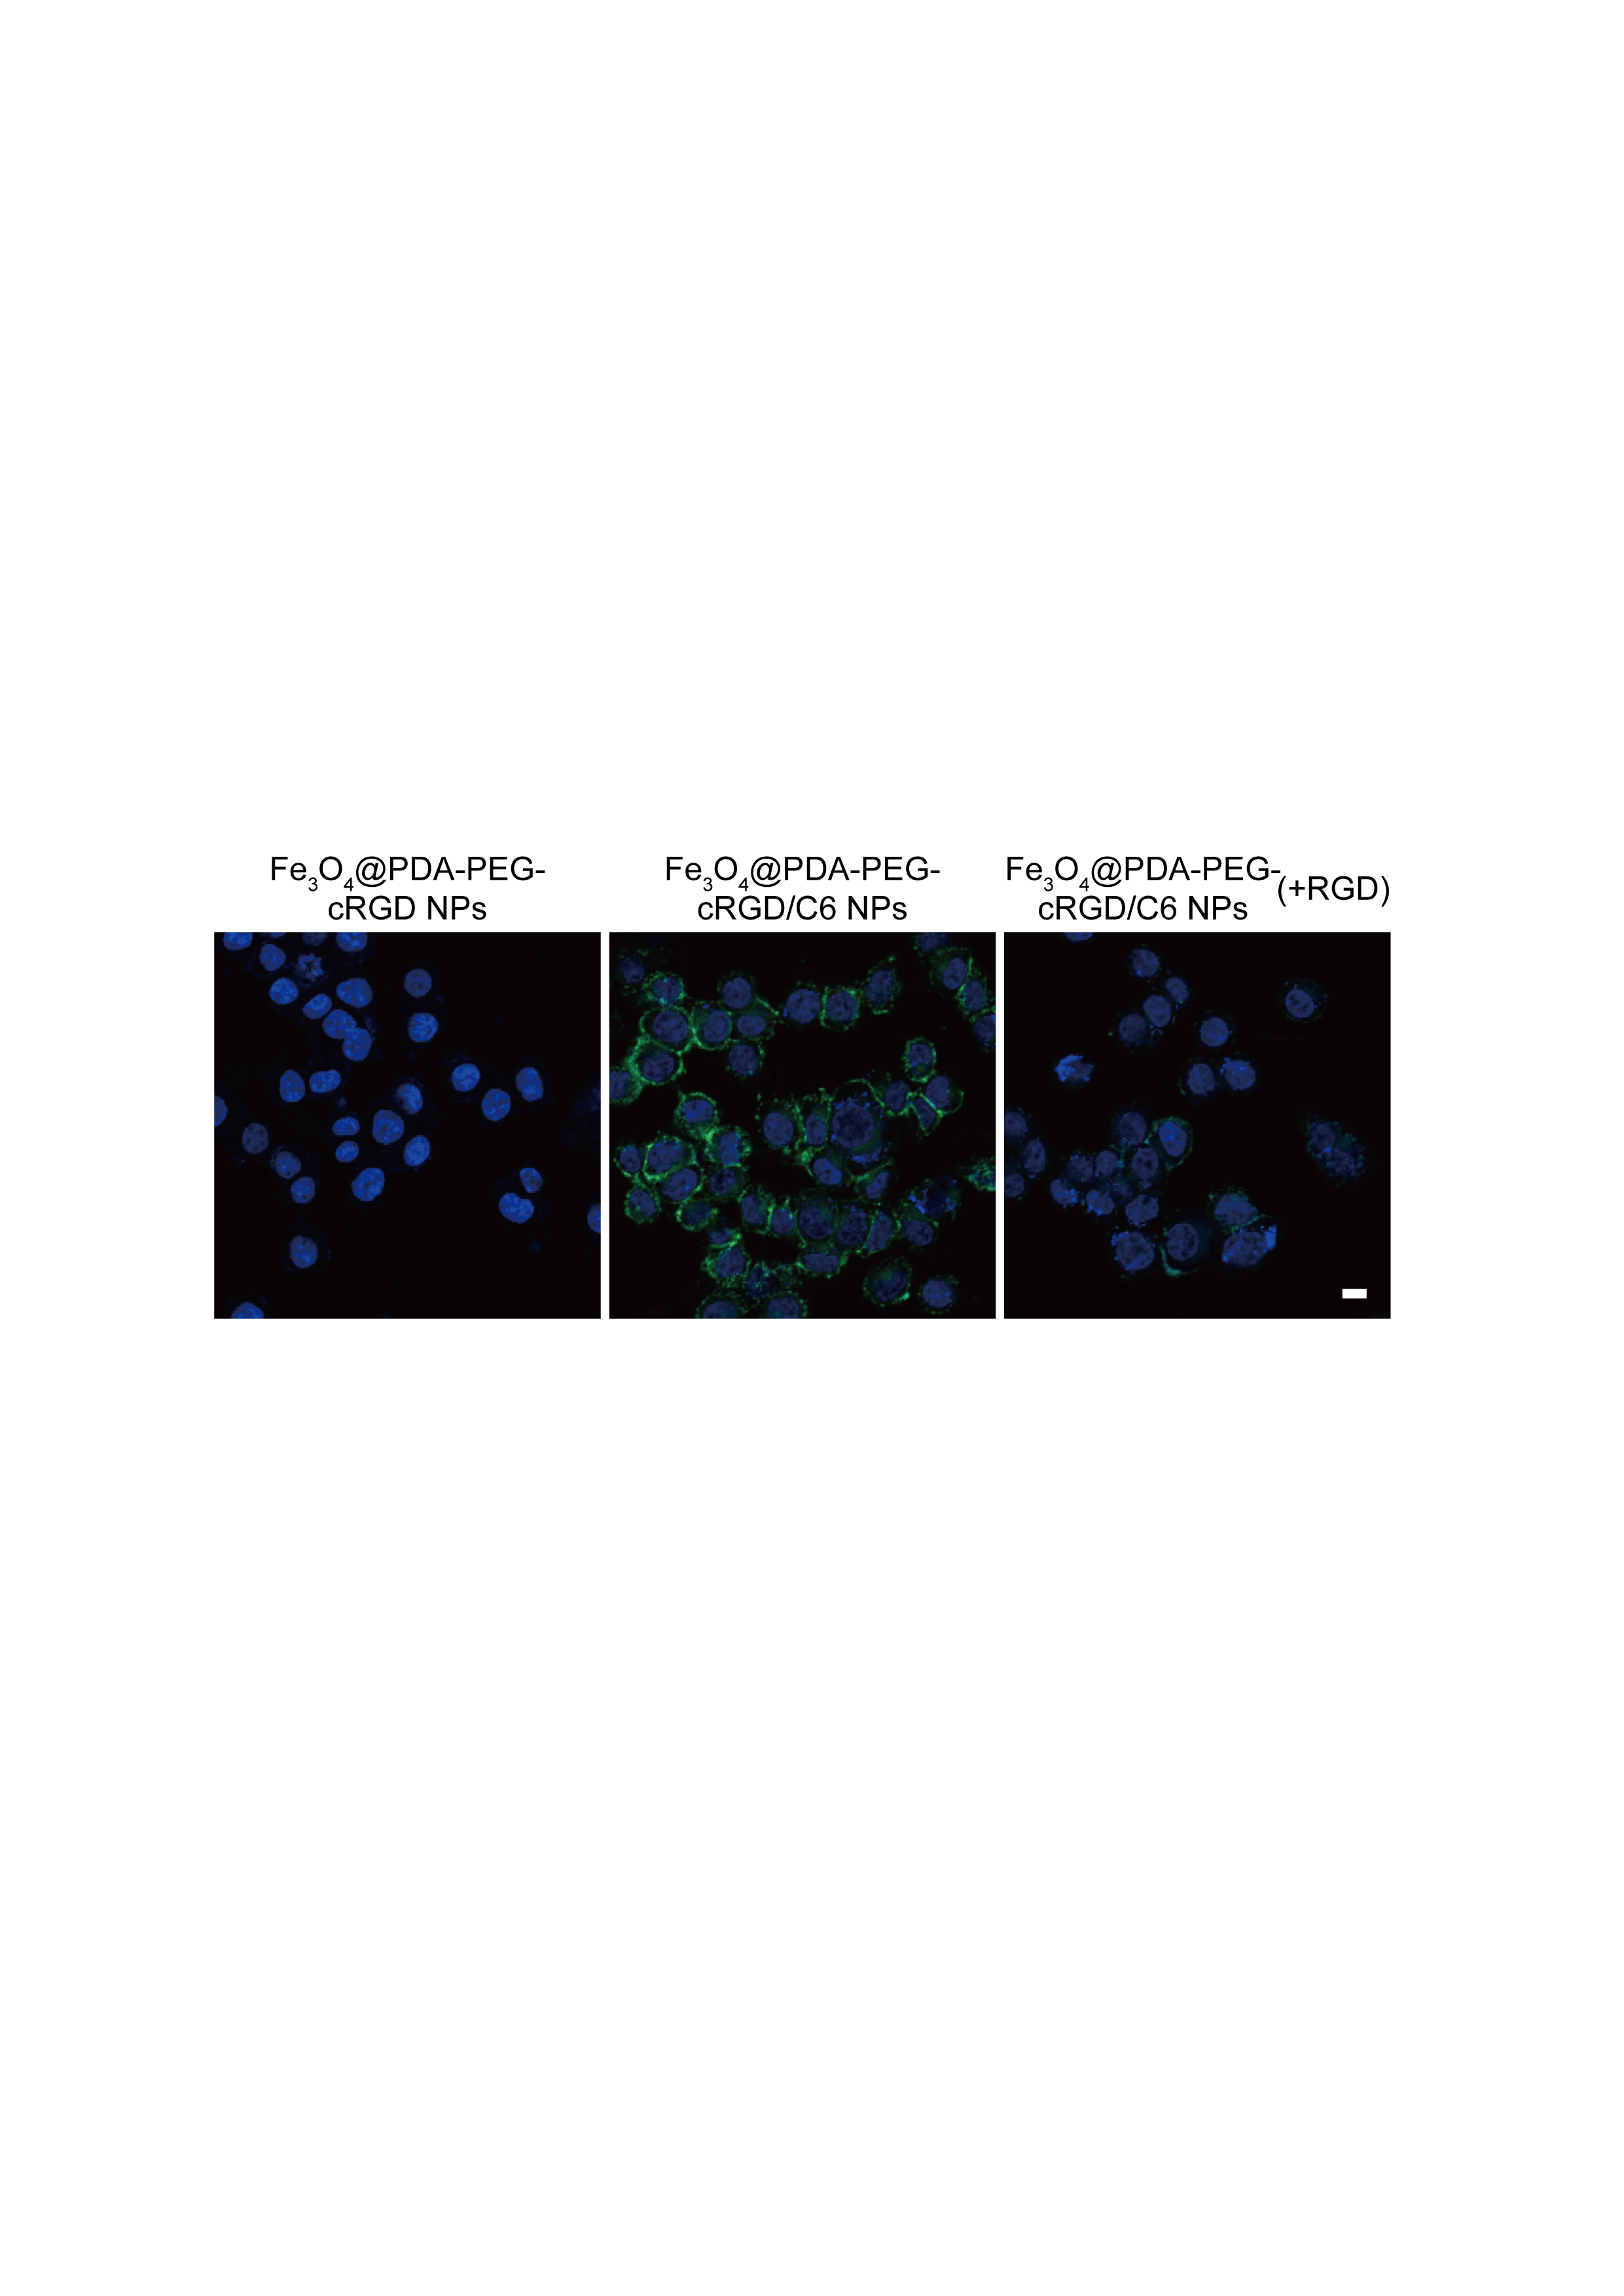
**

Figure S4. Cellular uptake of Fe3O4@PDA-PEG-cRGD NPs, Fe3O4@PDA-PEG-cRGD/C6 NPs and Fe3O4@PDA-PEG-cRGD/C6 NPs (pre-incubation with 0.3 µg/mL of free RGD for 0.5 h) in HCT116 cells after 4 h incubation (scale bar=20 μm).


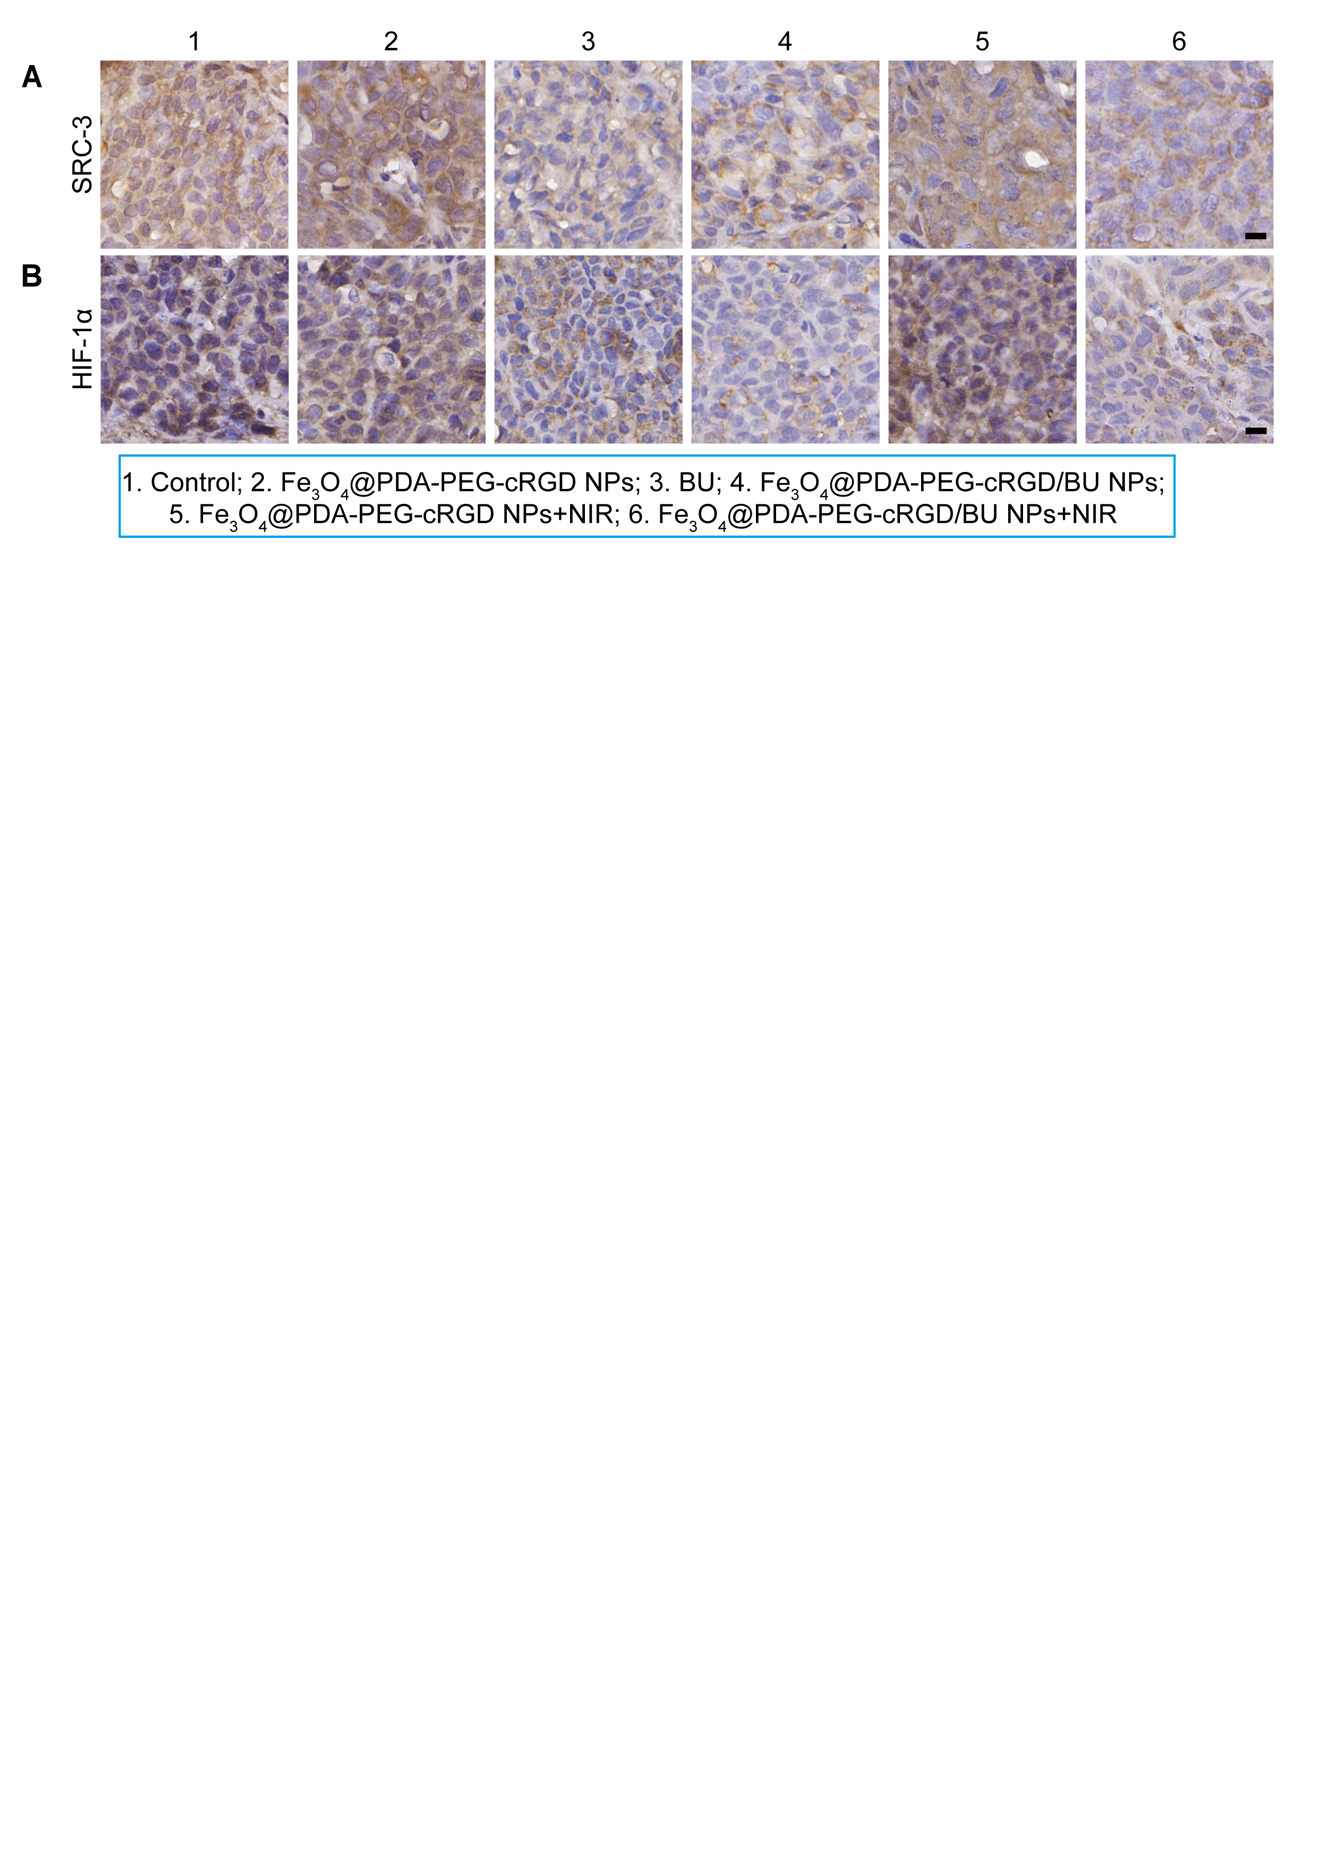


Figure S5. IHC for (A) SRC-3 and (B) HIF-1α of tumors after different treatments (scale bar=10 μm).

**
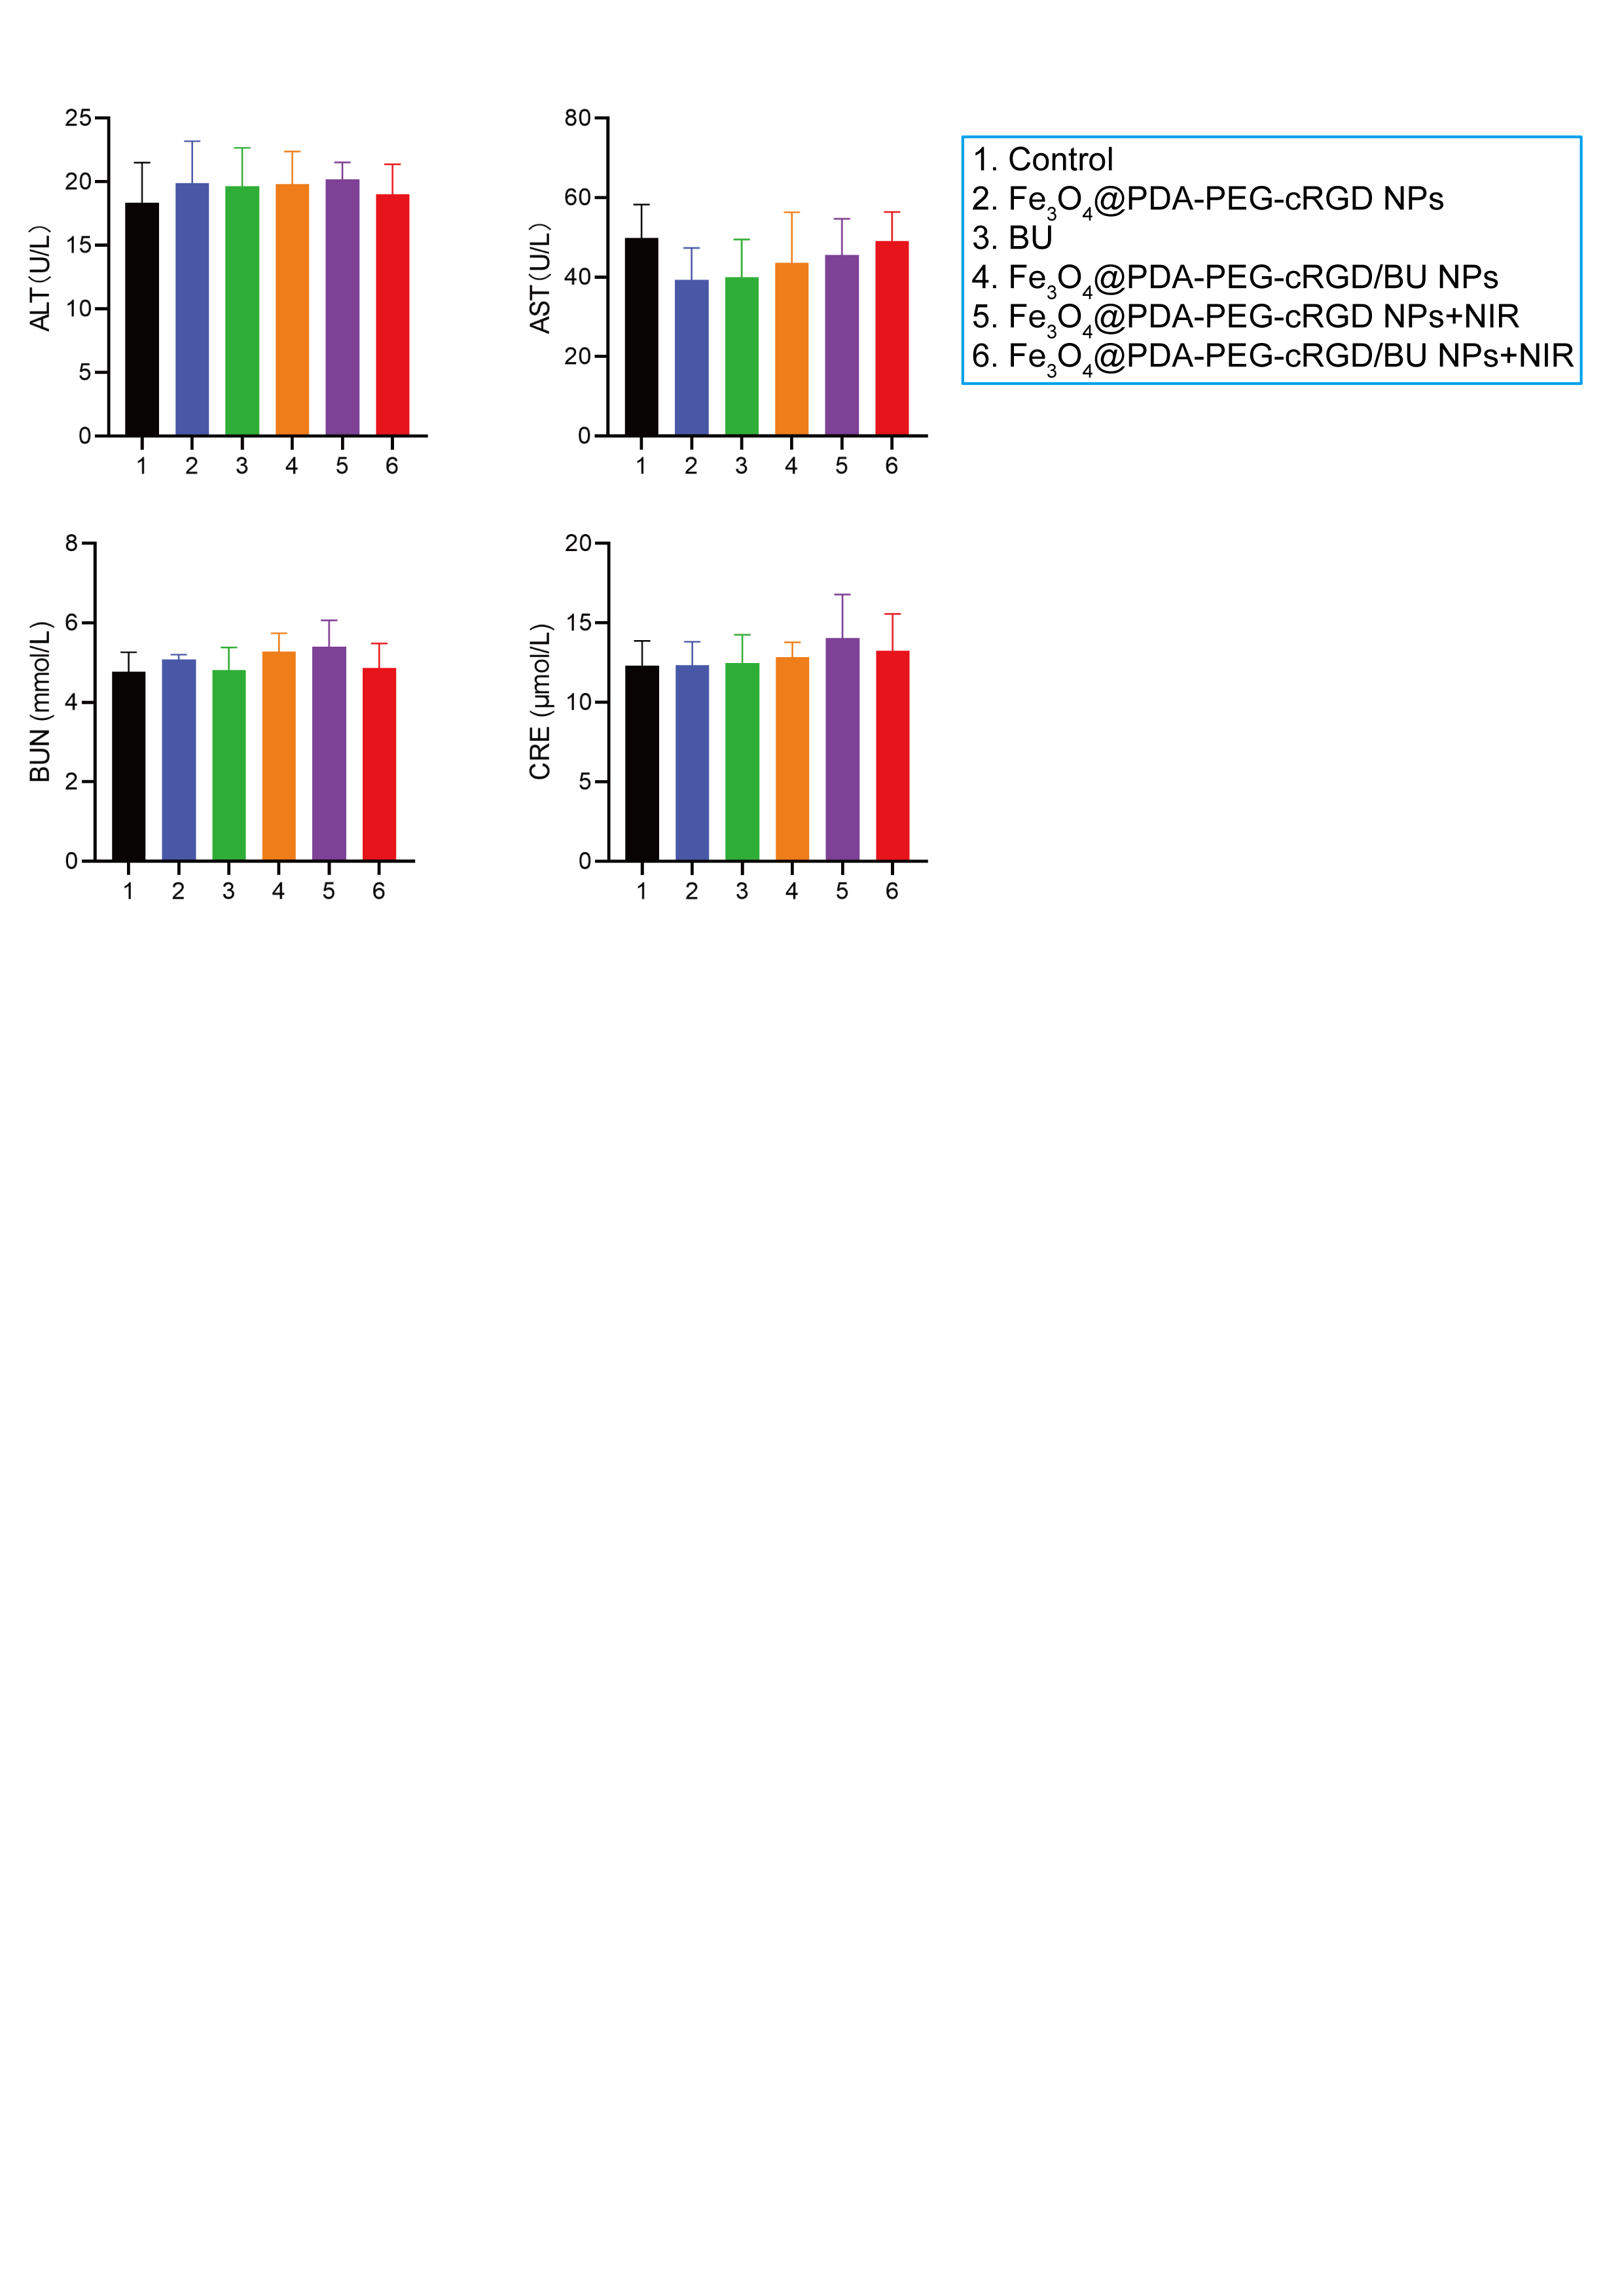
**

Figure S6. Biochemical analysis results of ALT, AST, BUN, and CRE.
